# Supplementary material for: “Distinct inhibitory neurons differently shape neuronal codes for sound intensity in the auditory cortex”
Source: PubMed Central journal article supplement — bioRxiv. 2024 Sep 27:2023.02.01.526470. Originally published 2023 Feb 2. Preprint. [Version 5] doi: 10.1101/2023.02.01.526470 (PMC9915672; doi:10.1101/2023.02.01.526470), 2024-09-27
Supplement: media-1.pdf [file media-1.pdf]

## SUPPLEMENTARY INFORMATION

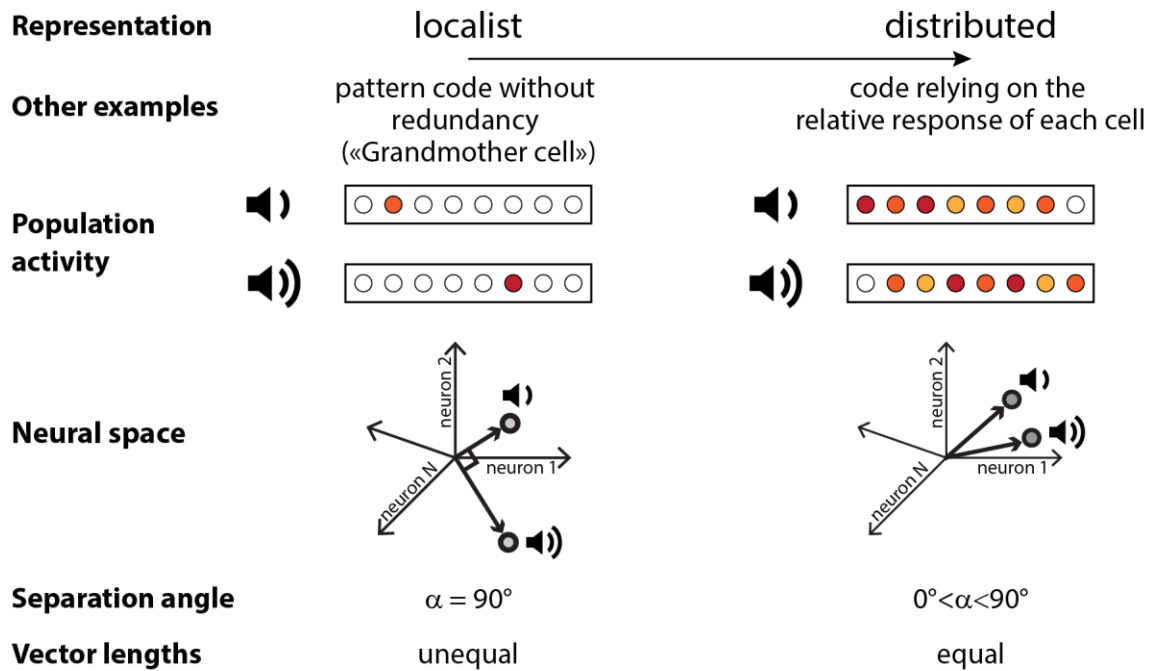

### SUPPLEMENTARY FIGURE S1: ADDITIONAL EXAMPLES OF LOCALIST AND DISTRIBUTED REPRESENTATIONS

Localist versus distributed representations can be implemented in many ways. An example of localist code is the pattern code without redundancy (known as the “Grandmother cell”, (Bowers, 2009) ). An example of distributed code is a code relying only on the relative response of each cell and not the magnitude of response of the population vector.

#### REFERENCE

Bowers, J.S., 2009. On the biological plausibility of grandmother cells: Implications for neural network theories in psychology and neuroscience. *Psychological Review* 116, 220–251. <https://doi.org/10.1037/a0014462>

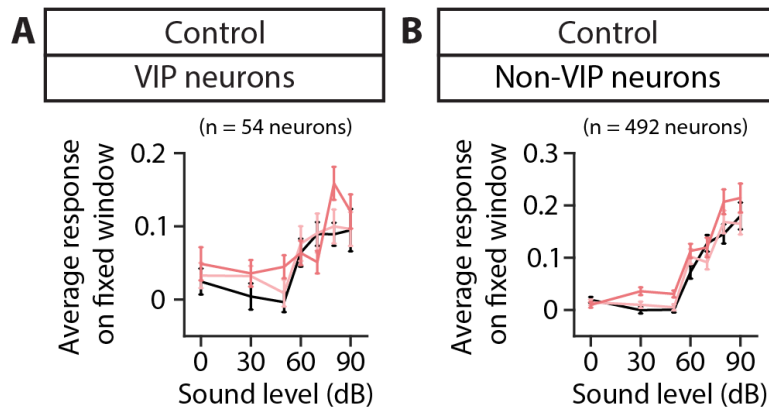

**SUPPLEMENTARY FIGURE S2: CONTROL EXPERIMENT - LASER EFFECT IN THE ABSENCE OF AN OPTOGENETIC CHANNEL**

A. Average fluorescence over a 1-s fixed window as a function of sound pressure level for the whole population of VIP neurons recorded, tagged with Flex.tdTomato, when the laser illuminates AC.

B. Average fluorescence over a 1-s fixed window as a function of sound pressure level for the whole population of neurons recorded (VIP neurons excluded) when the laser illuminates AC.

For all panels, black, pink and red colors correspond to no laser power (0 mW/mm<sup>2</sup>), medium laser power (~0.3 mW/mm<sup>2</sup>) and high laser power (~3.5 mW/mm<sup>2</sup>), respectively (see Methods for power calibration).

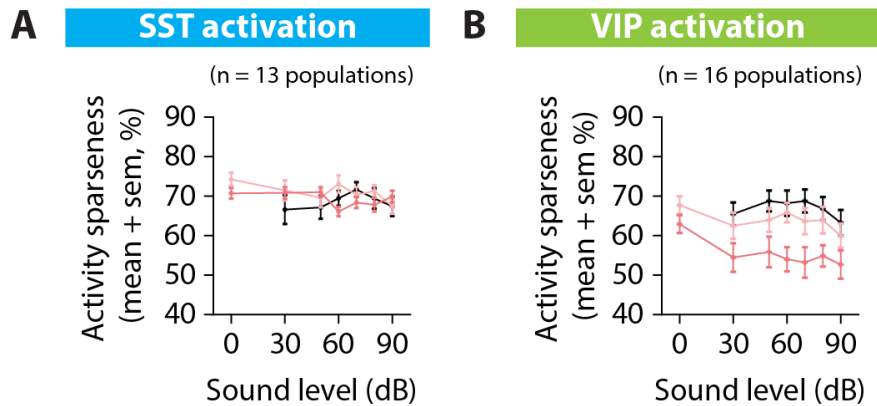

### SUPPLEMENTARY FIGURE S3: ACTIVITY SPARSENESS MEASURED FROM SILENCE AND NO LASER

A. Average activity sparseness measured from silence and no laser as a function of sound pressure level for each population of neurons (SST neurons excluded), when the SST population is activated. There was no significant change in activity sparseness measured from silence and no laser upon SST activation ( $p_{\text{laser}}=0.11$ , GLME).

B. Average activity sparseness measured from silence and no laser as a function of sound pressure level for each population of neurons (VIP neurons excluded), when the VIP population is activated. There was a significant decrease in activity sparseness measured from silence and no laser upon VIP activation ( $***p_{\text{laser}}=4.9e-4$ , GLME).

The activity sparseness here was computed by subtracting each neuron's response over its optimal window to its response at 0dB and no laser power, and computing the ratio of neurons with an increase in response below threshold. The threshold was set as the standard deviation of the distribution of responses to 0dB and no laser power for each population. The point at 0dB for no laser power was by calculation 100% and thus omitted from the plot and the statistical test. For all panels, black, pink and red colors correspond to no laser power (0 mW/mm<sup>2</sup>), medium laser power (~0.3 mW/mm<sup>2</sup>) and high laser power (~3.5 mW/mm<sup>2</sup>), respectively (see Methods for power calibration).

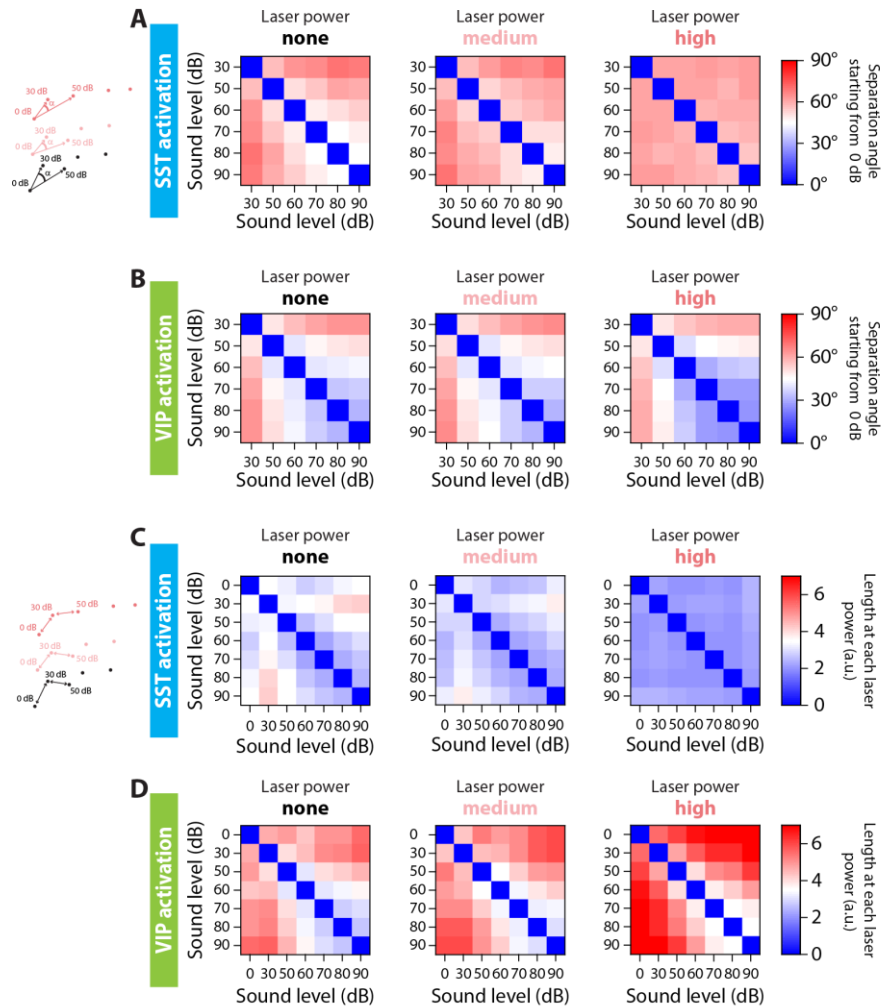

**SUPPLEMENTARY FIGURE S4: CONFUSION MATRICES OF SEPARATION ANGLES AND VECTOR LENGTHS AT EACH LASER POWER**

A. Confusion matrix of the separation angle between pairs of sound stimuli for no (left), medium (middle) and high (right) laser power of SST activation. Far left schematic: Low-dimensional schematic of the separation angle between mean population vectors to each sound pressure level at a given laser power, starting from 0dB at each laser power.

B. Confusion matrix of the separation angle between pairs of sound stimuli for no (left), medium (middle) and high (right) laser power of VIP activation.

C. Confusion matrix of the vector length between pairs of sound stimuli for no (left), medium (middle) and high (right) laser power of SST activation. Far left schematic: Low-dimensional schematic of the vector length of mean population vectors between sound pressure levels at a given laser power.

D. Confusion matrix of the vector length between pairs of sound stimuli for no (left), medium (middle) and high (right) laser power of VIP activation.

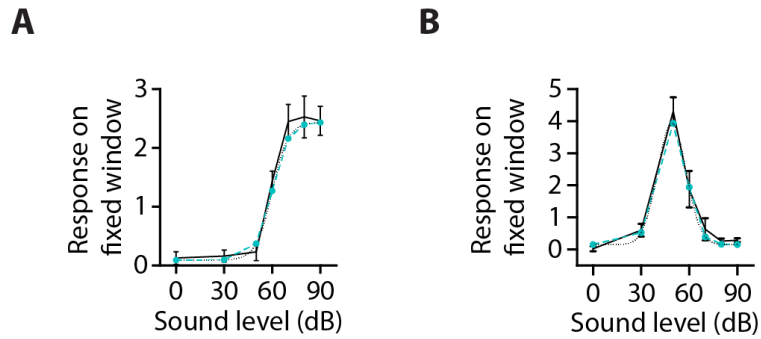

### SUPPLEMENTARY FIGURE S5: COMPLETE FITTING PROCEDURE FOR MONOTONIC AND NONMONOTONIC CELLS

A. Example neuron with a monotonic response-level curve (solid black line) with a sigmoid fit estimated at the probed sound amplitudes (blue dashed line with circles) and the sigmoid function with the same parameters (dotted black line). The parameters for the sigmoid fit are: Offset amplitude  $y_0 = 0.1$ ; Range  $y_{\text{range}} = 2.3$ ; Midpoint  $x_0 = 60$  dB; Width  $\Delta x = 5$  dB.

B. Example neuron with a nonmonotonic response-level curve (solid black line) with a Gaussian fit estimated at the probed sound pressure levels (blue dashed line with circles) and the Gaussian fit function with the same parameters (dotted black line). The parameters for the Gaussian fit are: Offset amplitude  $y_0 = 0.2$ ; Range  $y_{\text{range}} = 3.8$ ; Mean  $x_{\text{mean}} = 49$  dB; Standard Deviation  $\sigma = 9$  dB.

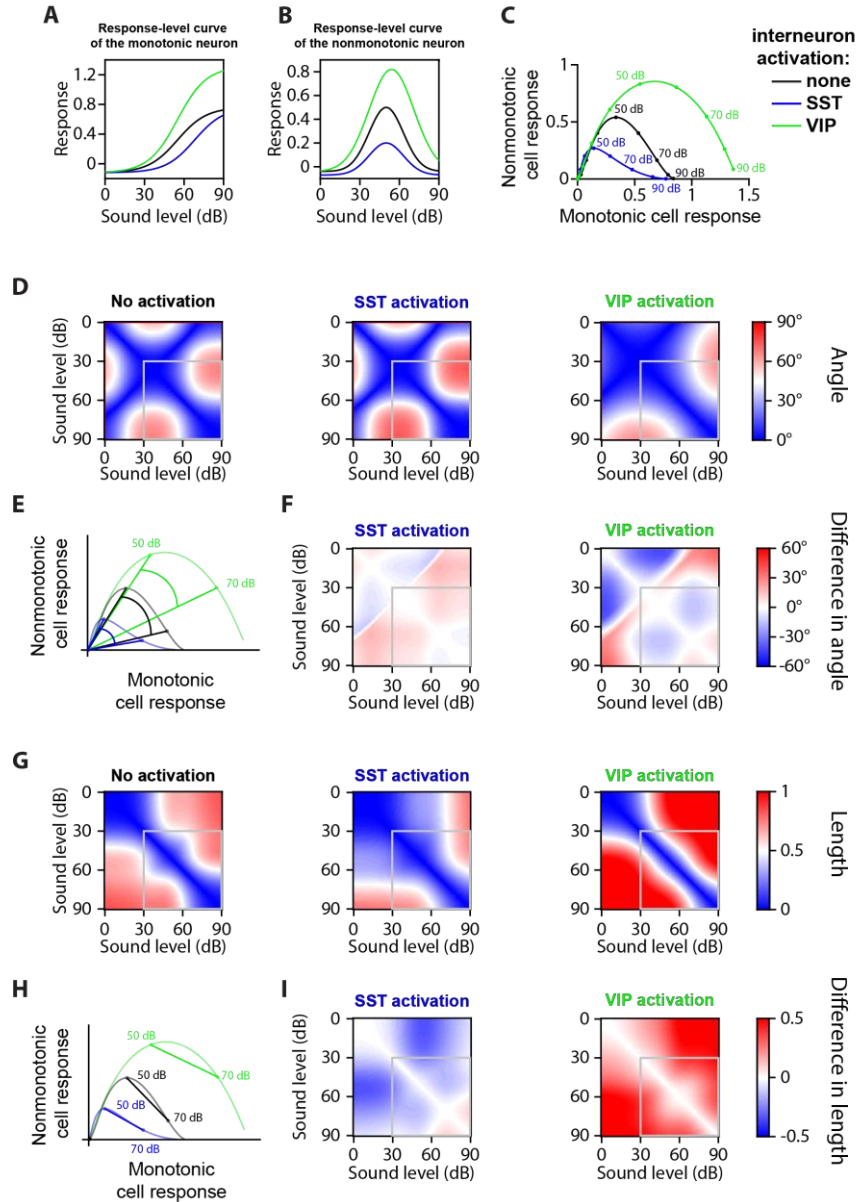

## SUPPLEMENTARY FIGURE S6: TWO-CELL MODEL

A. Response-level curve of the monotonic cell with parameters taken as the mean parameters from Figure 5 at no and high laser power. Black indicates no interneuron activation, blue indicates SST activation and green indicates VIP activation. The parameters for the sigmoid curve with no interneuron activation (black) are: Offset amplitude  $y_0 = -0.12$ ; Range  $y_{\text{range}} = 0.88$ ; Midpoint  $x_0 = 55$  dB; Width  $\Delta x = 11$  dB. Upon SST activation (blue), all parameters remain constant except for: Midpoint  $x_0^{\text{SST}} = 68$  dB; Upon VIP activation (green), all parameters remain constant except for: Range  $y_{\text{range}}^{\text{VIP}} = 1.43$ .

B. Response-level curve of the nonmonotonic cell with parameters taken as the mean parameters from Figure 6 at no and high laser power. Black indicates no interneuron activation, blue indicates

SST activation and green indicates VIP activation. The parameters for the Gaussian curve with no interneuron activation (black) are: Offset amplitude  $y_0 = -0.04$ ; Range  $y_{\text{range}} = 0.54$ ; Mean  $x_{\text{mean}} = 50$  dB; Standard Deviation  $\sigma = 13$  dB. Upon SST activation (blue), all parameters remain constant except for: Offset amplitude  $y_0^{\text{SST}} = -0.07$ ; Range  $y_{\text{range}}^{\text{SST}} = 0.27$ ; Upon VIP activation (green), the offset amplitude remains constant, and: Range  $y_{\text{range}}^{\text{VIP}} = 0.86$ ; Mean  $x_{\text{mean}} = 54$  dB; Standard Deviation  $\sigma = 17$  dB.

C. Trajectory of the population's response from 0dB to 90dB in the neural space, with the response of the monotonic cell on the  $x$ -axis and the response of the nonmonotonic cell on the  $y$ -axis. The response of both cells at 0dB has been subtracted from the curves, thus the dots at the (0,0) coordinate are the response to 0dB, and the end of the curves on the right indicate the response to 90dB. The trajectories are computed from 0 dB to 90dB with 1dB increments, and circles on a line represent 10dB increments from 0dB to 90dB. Black indicates no interneuron activation, blue indicates SST activation and green indicates VIP activation.

D. Confusion matrix of the separation angle between population responses to each sound and laser power from silence at a given laser power, for no (left), SST (middle) and VIP (right) activation. Sound pressure level is in 1dB increments, and the gray box indicates the sound levels sampled in the experiments (Figure 4D and F, Supplementary Figure S3A-B)

E. Schematic in the neural space (see panel C) of the angle between 50 dB and 70dB when there is no (black), SST (blue) or VIP (green) activation, starting from the population's response to silence for each case of (or lack of) interneuron activation. The angle is greatest when SST neurons are activated, and smallest when VIP neurons are activated.

F. Confusion matrix of the difference in separation angle from SST (left) or VIP (right) activation to no interneuron activation, with the angles calculated as in (D). Sound level is in 1dB increments, and the gray box indicates the sound pressure levels sampled in the experiments (Figure 4D and F, Supplementary Figure S3A-B). The mean angle difference for SST activation is, over 1-90dB:  $+3.6^\circ$  and over 30-90dB:  $+3.7^\circ$ ; for VIP activation, over 1-90dB:  $-4.0^\circ$ , and over 3-90dB:  $-4.1^\circ$ .

G. Confusion matrix of the length of the population vector between each sound pressure level at a given laser power, for no (left), SST (middle) and VIP (right) activation. Sound pressure level is in 1dB increments, and the gray box indicates the sound pressure levels sampled in the experiments (Figure 7I and K, Supplementary Figure S3C-D).

H. Schematic in the neural space (see panel C) of the vector length between 50 dB and 70dB when there is no (black), SST (blue) or VIP (green) activation. The vector length is greatest when VIP neurons are activated, and smallest when SST neurons are activated.

I. Confusion matrix of the difference in vector length from SST (left) or VIP (right) activation to no interneuron activation, with the lengths calculated as in (G). Sound pressure level is in 1dB increments, and the gray box indicates the sound pressure levels sampled in the experiments (Figure 7I and K, Supplementary Figure S3C-D). The mean length difference for SST activation is, over 1-90dB:  $-0.12$  a.u. and over 30-90dB:  $-0.07$  a.u.; for VIP activation, over 1-90dB,  $+0.27$  a.u. and over 30-90dB:  $+0.21$  a.u.

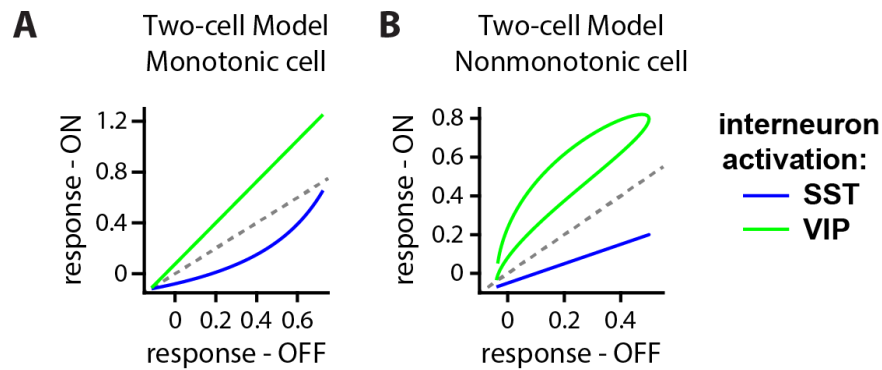

**SUPPLEMENTARY FIGURE S7: NEURAL RESPONSE LASER ON VERSUS LASER OFF FOR THE MONOTONIC AND NONMONOTONIC CELL FROM THE TWO-CELL MODEL**

A. Response of the monotonic cell with parameters taken as the mean parameters from Figure 5 (see Figure S5 for parameter values) with laser activation versus no laser activation. Blue indicates SST activation and green indicates VIP activation. SST activation shows a divisive regime, a subtractive regime, a combination of divisive and subtractive or multiplicative and subtractive regimes depending on the range of responses sampled. VIP activation shows a multiplicative regime or an additive and multiplicative regime depending on the range of responses sampled.

B. Response of the nonmonotonic cell with parameters taken as the mean parameters from Figure 6 (see Figure S5 for parameter values) with laser activation versus no laser activation. Blue indicates SST activation and green indicates VIP activation. SST activation shows a combination of divisive and subtractive regime. VIP activation shows a multiplicative regime, and additive regime or an additive and multiplicative regime depending on the range of responses sampled.



## STATISTICS TABLE

We used a Generalized Linear Mixed-Effects (GLME) model to compute the statistics for the data.

For Figure 2, Figure 3B,C,E,G,H, J; Figure S2, Figure S3, the data ('table') had four columns: cell, sound level, laser power, output. The formula used was (Matlab):

```
glme=fitglme(table, 'output ~ sound + laser + sound*laser + (1|cell)');
```

For Figure 3D,I, Figure 5 and Figure 6, the data ('table') had three columns: cell, laser power, output. The formula used was (Matlab): `glme=fitglme(table, 'output ~ laser + (1|cell)');`

For Figure 4D,F,H,G, the data ('table') had four columns: cell, sound level difference, laser power, output. The formula used was (Matlab): `glme=fitglme(table, 'output ~ sounddiff + laser + sounddiff*laser + (1|cell)');`

| Comparison                                  | Figure | N          | Test | Test Statistic                                                                                               | p-value                                                                                                            | Effect size                                                                                                                         |
|---------------------------------------------|--------|------------|------|--------------------------------------------------------------------------------------------------------------|--------------------------------------------------------------------------------------------------------------------|-------------------------------------------------------------------------------------------------------------------------------------|
| <b>FIGURE 2</b>                             |        |            |      |                                                                                                              |                                                                                                                    |                                                                                                                                     |
| SST neuron with SST activation              | Fig 2D | 10 repeats | GLME | t <sub>laser</sub> =7.89<br>t <sub>sound</sub> =0.34<br>t <sub>laser:sound</sub> =-0.55<br><br>DF = 206      | ***p <sub>laser</sub> = <b>1.8e-13</b><br>p <sub>sound</sub> =0.74<br>p <sub>laser:sound</sub> =0.58               | η <sub>laser</sub> <sup>2</sup> =0.58<br>η <sub>sound</sub> <sup>2</sup> =3.8e-3<br>η <sub>laser:sound</sub> <sup>2</sup> =1.5e-2   |
| Sound-increasing neuron with SST activation | Fig 2E | 10 repeats | GLME | t <sub>laser</sub> =0.33<br>t <sub>sound</sub> =12.37<br>t <sub>laser:sound</sub> =-8.34<br><br>DF = 206     | p <sub>laser</sub> =0.74<br>***p <sub>sound</sub> = <b>1.2e-26</b><br>***p <sub>laser:sound</sub> = <b>1.0e-14</b> | η <sub>laser</sub> <sup>2</sup> =2.3e-3<br>η <sub>sound</sub> <sup>2</sup> =0.84<br>η <sub>laser:sound</sub> <sup>2</sup> =0.78     |
| VIP neuron with VIP activation              | Fig 2F | 10 repeats | GLME | t <sub>laser</sub> =5.40<br>t <sub>sound</sub> =0.93<br>t <sub>laser:sound</sub> =-2.56<br><br>DF = 206      | ***p <sub>laser</sub> = <b>1.8e-7</b><br>p <sub>sound</sub> =0.35<br>*p <sub>laser:sound</sub> = <b>1.1e-2</b>     | η <sub>laser</sub> <sup>2</sup> =0.39<br>η <sub>sound</sub> <sup>2</sup> =2.8e-2<br>η <sub>laser:sound</sub> <sup>2</sup> =0.25     |
| Sound-increasing neuron with VIP activation | Fig 2G | 10 repeats | GLME | t <sub>laser</sub> =2.45<br>t <sub>sound</sub> =3.06<br>t <sub>laser:sound</sub> =1.11<br><br>DF = 206       | *p <sub>laser</sub> = <b>1.5e-2</b><br>**p <sub>sound</sub> = <b>2.5e-3</b><br>p <sub>laser:sound</sub> =0.27      | η <sub>laser</sub> <sup>2</sup> =0.12<br>η <sub>sound</sub> <sup>2</sup> =0.24<br>η <sub>laser:sound</sub> <sup>2</sup> =5.8e-2     |
| <b>FIGURE 3</b>                             |        |            |      |                                                                                                              |                                                                                                                    |                                                                                                                                     |
| SST neurons with SST activation             | Fig 3B | 132 cells  | GLME | t <sub>laser</sub> =36.91<br>t <sub>sound</sub> =1.32<br>t <sub>laser:sound</sub> =0.16<br><br>DF = 27716    | ***p <sub>laser</sub> = <b>3.1e-291</b><br>p <sub>sound</sub> =0.19<br>p <sub>laser:sound</sub> =0.88              | η <sub>laser</sub> <sup>2</sup> =0.14<br>η <sub>sound</sub> <sup>2</sup> =3.2e-4<br>η <sub>laser:sound</sub> <sup>2</sup> =6.7e-6   |
| All non-SST neurons with SST activation     | Fig 3C | 2152 cells | GLME | t <sub>laser</sub> =-1.27<br>t <sub>sound</sub> =10.75<br>t <sub>laser:sound</sub> =-6.35<br><br>DF = 451916 | p <sub>laser</sub> =0.20<br>***p <sub>sound</sub> = <b>5.9e-27</b><br>***p <sub>laser:sound</sub> = <b>2.2e-10</b> | η <sub>laser</sub> <sup>2</sup> =1.5e-5<br>η <sub>sound</sub> <sup>2</sup> =1.6e-3<br>η <sub>laser:sound</sub> <sup>2</sup> =8.5e-4 |

|                                         |        |                |      |                                                                                                      |                                                                                                                                                                                   |                                                                                                                               |
|-----------------------------------------|--------|----------------|------|------------------------------------------------------------------------------------------------------|-----------------------------------------------------------------------------------------------------------------------------------------------------------------------------------|-------------------------------------------------------------------------------------------------------------------------------|
| Sparseness with SST activation          | Fig 3D | 2152 cells     | GLME | $t_{\text{laser}}=3.39$<br>DF = 6454                                                                 | <b>***<math>p_{\text{laser}}=7.1\text{e-}4</math></b>                                                                                                                             | $\eta_{\text{laser}}^2=1.7\text{e-}3$                                                                                         |
| Activity sparseness with SST activation | Fig 3E | 13 populations | GLME | $t_{\text{laser}}=3.20$<br>$t_{\text{sound}}=0.69$<br>$t_{\text{laser:sound}}=-0.99$<br>DF = 230     | <b>**<math>p_{\text{laser}}=1.6\text{e-}3</math></b><br>$p_{\text{sound}}=0.49$<br>$p_{\text{laser:sound}}=0.33$                                                                  | $\eta_{\text{laser}}^2=0.26$<br>$\eta_{\text{sound}}^2=9.8\text{e-}3$<br>$\eta_{\text{laser:sound}}^2=4.8\text{e-}2$          |
| VIP neurons with VIP activation         | Fig 3G | 226 cells      | GLME | $t_{\text{laser}}=41.50$<br>$t_{\text{sound}}=2.71$<br>$t_{\text{laser:sound}}=-1.96$<br>DF = 47456  | <b>***<math>p_{\text{laser}}=0</math></b><br><b>**<math>p_{\text{sound}}=6.7\text{e-}3</math></b><br><b>*<math>p_{\text{laser:sound}}=4.95\text{e-}2</math></b>                   | $\eta_{\text{laser}}^2=0.12$<br>$\eta_{\text{sound}}^2=9.3\text{e-}4$<br>$\eta_{\text{laser:sound}}^2=7.3\text{e-}4$          |
| All non-VIP neurons with VIP activation | Fig 3H | 3095 cells     | GLME | $t_{\text{laser}}=34.18$<br>$t_{\text{sound}}=11.32$<br>$t_{\text{laser:sound}}=8.41$<br>DF = 649946 | <b>***<math>p_{\text{laser}}=7.8\text{e-}256</math></b><br><b>***<math>p_{\text{sound}}=1.1\text{e-}29</math></b><br><b>***<math>p_{\text{laser:sound}}=4.1\text{e-}17</math></b> | $\eta_{\text{laser}}^2=6.0\text{e-}3$<br>$\eta_{\text{sound}}^2=1.0\text{e-}3$<br>$\eta_{\text{laser:sound}}^2=8.4\text{e-}4$ |
| Sparseness with VIP activation          | Fig 3I | 3095 cells     | GLME | $t_{\text{laser}}=-22.95$<br>DF = 9283                                                               | <b>***<math>p_{\text{laser}}=2.2\text{e-}113</math></b>                                                                                                                           | $\eta_{\text{laser}}^2=4.8\text{e-}2$                                                                                         |
| Activity sparseness with VIP activation | Fig 3J | 16 populations | GLME | $t_{\text{laser}}=0.78$<br>$t_{\text{sound}}=-0.01$<br>$t_{\text{laser:sound}}=-0.49$<br>DF = 284    | $p_{\text{laser}}=0.44$<br>$p_{\text{sound}}=0.99$<br>$p_{\text{laser:sound}}=0.62$                                                                                               | $\eta_{\text{laser}}^2=1.3\text{e-}2$<br>$\eta_{\text{sound}}^2=1.8\text{e-}6$<br>$\eta_{\text{laser:sound}}^2=8.2\text{e-}3$ |

#### FIGURE 4

|                                                                |        |                           |      |                                                                                                                |                                                                                                                                                                                               |                                                                                                                                            |
|----------------------------------------------------------------|--------|---------------------------|------|----------------------------------------------------------------------------------------------------------------|-----------------------------------------------------------------------------------------------------------------------------------------------------------------------------------------------|--------------------------------------------------------------------------------------------------------------------------------------------|
| Separation angle from 0dB at each laser power – SST activation | Fig 4D | 15 angles, 13 recordings  | GLME | $t_{\text{laser}}=8.80$<br>$t_{\Delta\text{sound}}=12.37$<br>$t_{\text{laser:\Delta sound}}=-7.44$<br>DF = 581 | <b>***<math>p_{\text{laser}}=1.6\text{e-}17</math></b><br><b>***<math>p_{\Delta\text{sound}}=2.3\text{e-}31</math></b><br><b>***<math>p_{\text{laser:\Delta sound}}=3.6\text{e-}13</math></b> | $\eta_{\text{laser}}^2=0.30$<br>$\eta_{\Delta\text{sound}}^2=0.58$<br>$\eta_{\text{laser:\Delta sound}}^2=0.43$                            |
| Separation angle from 0dB at each laser power – VIP activation | Fig 4F | 15 angles, 16 recordings  | GLME | $t_{\text{laser}}=-2.75$<br>$t_{\Delta\text{sound}}=7.32$<br>$t_{\text{laser:\Delta sound}}=0.73$<br>DF = 716  | <b>**<math>p_{\text{laser}}=6.1\text{e-}3</math></b><br><b>***<math>p_{\Delta\text{sound}}=6.9\text{e-}13</math></b><br>$p_{\text{laser:\Delta sound}}=0.47$                                  | $\eta_{\text{laser}}^2=3.0\text{e-}2$<br>$\eta_{\Delta\text{sound}}^2=0.26$<br>$\eta_{\text{laser:\Delta sound}}^2=5.2\text{e-}3$          |
| Vector length at each laser power – SST activation             | Fig 4H | 21 lengths, 13 recordings | GLME | $t_{\text{laser}}=-4.71$<br>$t_{\Delta\text{sound}}=5.71$<br>$t_{\text{laser:\Delta sound}}=-3.57$<br>DF = 815 | <b>***<math>p_{\text{laser}}=2.9\text{e-}6</math></b><br><b>***<math>p_{\Delta\text{sound}}=1.6\text{e-}8</math></b><br><b>***<math>p_{\text{laser:\Delta sound}}=3.8\text{e-}4</math></b>    | $\eta_{\text{laser}}^2=6.1\text{e-}2$<br>$\eta_{\Delta\text{sound}}^2=0.16$<br>$\eta_{\text{laser:\Delta sound}}^2=9.1\text{e-}2$          |
| Vector length at each laser power – VIP activation             | Fig 4J | 21 lengths, 16 recordings | GLME | $t_{\text{laser}}=2.50$<br>$t_{\Delta\text{sound}}=4.03$<br>$t_{\text{laser:\Delta sound}}=4.84$<br>DF = 1004  | <b>*<math>p_{\text{laser}}=1.2\text{e-}2</math></b><br><b>***<math>p_{\Delta\text{sound}}=6.1\text{e-}5</math></b><br><b>***<math>p_{\text{laser:\Delta sound}}=1.5\text{e-}6</math></b>      | $\eta_{\text{laser}}^2=9.7\text{e-}3$<br>$\eta_{\Delta\text{sound}}^2=4.8\text{e-}2$<br>$\eta_{\text{laser:\Delta sound}}^2=9.0\text{e-}2$ |

#### FIGURE 5

|                                            |        |                                    |      |                                     |                                  |                                       |
|--------------------------------------------|--------|------------------------------------|------|-------------------------------------|----------------------------------|---------------------------------------|
| Sigmoid fit – offset – with SST activation | Fig 5D | None: 109<br>Med: 103<br>High: 64  | GLME | $t_{\text{laser}}=0.83$<br>DF = 274 | $p_{\text{laser}}=0.41$          | $\eta_{\text{laser}}^2=2.4\text{e-}3$ |
| Sigmoid fit – offset – with VIP activation | Fig 5D | None: 267<br>Med: 239<br>High: 269 | GLME | $t_{\text{laser}}=1.74$<br>DF = 773 | $p_{\text{laser}}=8.1\text{e-}2$ | $\eta_{\text{laser}}^2=3.6\text{e-}3$ |

|                                                         |        |                                    |      |                                |                                         |                         |
|---------------------------------------------------------|--------|------------------------------------|------|--------------------------------|-----------------------------------------|-------------------------|
| Sigmoid fit – range – with SST activation               | Fig 5E | None: 109<br>Med: 103<br>High: 64  | GLME | $t_{laser}=-1.24$<br>DF = 274  | $p_{laser}=0.22$                        | $\eta_{laser}^2=3.1e-3$ |
| Sigmoid fit – range – with VIP activation               | Fig 5E | None: 267<br>Med: 239<br>High: 269 | GLME | $t_{laser}=3.11$<br>DF = 773   | <b>**<math>p_{laser}=1.9e-3</math></b>  | $\eta_{laser}^2=9.4e-3$ |
| Sigmoid fit – midpoint – with SST activation            | Fig 5F | None: 109<br>Med: 103<br>High: 64  | GLME | $t_{laser}=2.65$<br>DF = 274   | <b>**<math>p_{laser}=8.6e-3</math></b>  | $\eta_{laser}^2=2.1e-2$ |
| Sigmoid fit – midpoint – with VIP activation            | Fig 5F | None: 267<br>Med: 239<br>High: 269 | GLME | $t_{laser}=-0.88$<br>DF = 773  | $p_{laser}=0.38$                        | $\eta_{laser}^2=5.9e-4$ |
| Sigmoid fit – width – with SST activation               | Fig 5G | None: 109<br>Med: 103<br>High: 64  | GLME | $t_{laser}=-0.019$<br>DF = 274 | $p_{laser}=0.99$                        | $\eta_{laser}^2=8.8e-7$ |
| Sigmoid fit – width – with VIP activation               | Fig 5G | None: 267<br>Med: 239<br>High: 269 | GLME | $t_{laser}=0.56$<br>DF = 773   | $p_{laser}=0.57$                        | $\eta_{laser}^2=2.2e-4$ |
| <b>FIGURE 6</b>                                         |        |                                    |      |                                |                                         |                         |
| Gaussian fit – offset – with SST activation             | Fig 6D | None: 224<br>Med: 175<br>High: 130 | GLME | $t_{laser}=-3.16$<br>DF = 527  | <b>**<math>p_{laser}=1.7e-3</math></b>  | $\eta_{laser}^2=1.8e-2$ |
| Gaussian fit – offset – with VIP activation             | Fig 6D | None: 243<br>Med: 278<br>High: 310 | GLME | $t_{laser}=0.71$<br>DF = 829   | $p_{laser}=0.48$                        | $\eta_{laser}^2=5.3e-4$ |
| Gaussian fit – range – with SST activation              | Fig 6E | None: 224<br>Med: 175<br>High: 130 | GLME | $t_{laser}=-5.41$<br>DF = 527  | <b>***<math>p_{laser}=9.4e-8</math></b> | $\eta_{laser}^2=3.8e-2$ |
| Gaussian fit – range – with VIP activation              | Fig 6E | None: 243<br>Med: 278<br>High: 310 | GLME | $t_{laser}=5.60$<br>DF = 829   | <b>***<math>p_{laser}=2.9e-8</math></b> | $\eta_{laser}^2=1.7e-2$ |
| Gaussian fit – mean – with SST activation               | Fig 6F | None: 224<br>Med: 175<br>High: 130 | GLME | $t_{laser}=0.35$<br>DF = 527   | $p_{laser}=0.73$                        | $\eta_{laser}^2=1.9e-4$ |
| Gaussian fit – mean – with VIP activation               | Fig 6F | None: 243<br>Med: 278<br>High: 310 | GLME | $t_{laser}=3.34$<br>DF = 829   | <b>***<math>p_{laser}=8.6e-4</math></b> | $\eta_{laser}^2=7.4e-3$ |
| Gaussian fit – standard deviation – with SST activation | Fig 6G | None: 224<br>Med: 175<br>High: 130 | GLME | $t_{laser}=-0.63$<br>DF = 527  | $p_{laser}=0.53$                        | $\eta_{laser}^2=7.3e-4$ |
| Gaussian fit – standard deviation – with VIP activation | Fig 6G | None: 243<br>Med: 278<br>High: 310 | GLME | $t_{laser}=3.96$<br>DF = 829   | <b>***<math>p_{laser}=8.1e-5</math></b> | $\eta_{laser}^2=1.7e-2$ |

| Comparison                                                          | Figure   | N              | Test | Test Statistic                                                                                          | p-value                                                                                                                           | Effect size                                                                                              |
|---------------------------------------------------------------------|----------|----------------|------|---------------------------------------------------------------------------------------------------------|-----------------------------------------------------------------------------------------------------------------------------------|----------------------------------------------------------------------------------------------------------|
| <b>SUPPLEMENTARY FIGURES</b>                                        |          |                |      |                                                                                                         |                                                                                                                                   |                                                                                                          |
| <b>FIGURE S2</b>                                                    |          |                |      |                                                                                                         |                                                                                                                                   |                                                                                                          |
| Control: VIP neurons with laser activation                          | Fig S2 A | 54 cells       | GLME | $t_{\text{laser}}=1.27$<br>$t_{\text{sound}}=2.99$<br>$t_{\text{laser:sound}}=-0.11$<br><br>DF = 11336  | $p_{\text{laser}}=0.20$<br><b>**<math>p_{\text{sound}}=2.8e-3</math></b><br>$p_{\text{laser:sound}}=0.91$                         | $\eta_{\text{laser}}^2=6.5e-4$<br>$\eta_{\text{sound}}^2=5.5e-3$<br>$\eta_{\text{laser:sound}}^2=1.1e-5$ |
| Control: All neurons (VIP excluded) with laser activation           | Fig S2 B | 492 cells      | GLME | $t_{\text{laser}}=0.46$<br>$t_{\text{sound}}=12.23$<br>$t_{\text{laser:sound}}=3.27$<br><br>DF = 103316 | $p_{\text{laser}}=0.64$<br><b>***<math>p_{\text{sound}}=2.1e-34</math></b><br><b>**<math>p_{\text{laser:sound}}=1.1e-3</math></b> | $\eta_{\text{laser}}^2=8.5e-6$<br>$\eta_{\text{sound}}^2=9.0e-3$<br>$\eta_{\text{laser:sound}}^2=9.8e-4$ |
| <b>FIGURE S3</b>                                                    |          |                |      |                                                                                                         |                                                                                                                                   |                                                                                                          |
| Activity sparseness from 0dB and no laser power with SST activation | Fig S3 A | 13 populations | GLME | $t_{\text{laser}}=1.60$<br>$t_{\text{sound}}=1.17$<br>$t_{\text{laser:sound}}=-1.54$<br><br>DF = 230    | $p_{\text{laser}}=0.11$<br>$p_{\text{sound}}=0.24$<br>$p_{\text{laser:sound}}=0.12$                                               | $\eta_{\text{laser}}^2=5.5e-2$<br>$\eta_{\text{sound}}^2=1.9e-2$<br>$\eta_{\text{laser:sound}}^2=7.7e-2$ |
| Activity sparseness from 0dB and no laser power with VIP activation | Fig S3 B | 16 populations | GLME | $t_{\text{laser}}=-3.52$<br>$t_{\text{sound}}=-0.49$<br>$t_{\text{laser:sound}}=0.0059$<br><br>DF = 284 | <b>***<math>p_{\text{laser}}=4.9e-4</math></b><br>$p_{\text{sound}}=0.62$<br>$p_{\text{laser:sound}}=0.995$                       | $\eta_{\text{laser}}^2=0.15$<br>$\eta_{\text{sound}}^2=2.1e-3$<br>$\eta_{\text{laser:sound}}^2=7.6e-7$   |

#### Mouse strains and numbers

| Experiment                                       | Figures  | Strain          | Number of mice | Number of recordings |
|--------------------------------------------------|----------|-----------------|----------------|----------------------|
| GCaMP7f + ChrimsonR                              | Figs 2-6 | CDH23 x VIP-Cre | 2              | 7                    |
|                                                  |          | CDH23 x SST-Cre | 5              | 13                   |
| GCaMP6m + ChrimsonR                              | Figs 2-6 | CDH23 x VIP-Cre | 2              | 9                    |
|                                                  |          | CDH23 x SST-Cre | 0              | 0                    |
| Control: GCaMP7f + Flex.tdTomato – VIP cells     | Fig S2A  | CDH23 x VIP-Cre | 4              | 7                    |
| Control: GCaMP7f + Flex.tdTomato – Non-VIP cells | Fig S2B  | CDH23 x VIP-Cre | 2              | 4                    |
